# Supplementary material
Source: HighWire-hosted journal article supplement (https://fn.bmj.com/content/archdischild-2019-317165)
Supplement: inline-supplementary-material-2 [file inline-supplementary-material-2.pdf]

## Sepsis Risk Calculator: Guidance to Determine the Risk Estimate at Birth

Reproduced with the kind permission of author: Dr. Karen Puopolo;  
Email: [Karen.Puopolo@uphs.upenn.edu](mailto:Karen.Puopolo@uphs.upenn.edu); [PUOPOLOK@email.chop.edu](mailto:PUOPOLOK@email.chop.edu)

Last Updated: 3.26.2018

| Calculator Input                                | Value to be entered                                                                                                                                                                                                                                                                                                                                                                                                                                                                                                                                                                                                                                                                                                                                                                                                                                                                                       | Notes                                                                                                                                                                                                                                                                     |
|-------------------------------------------------|-----------------------------------------------------------------------------------------------------------------------------------------------------------------------------------------------------------------------------------------------------------------------------------------------------------------------------------------------------------------------------------------------------------------------------------------------------------------------------------------------------------------------------------------------------------------------------------------------------------------------------------------------------------------------------------------------------------------------------------------------------------------------------------------------------------------------------------------------------------------------------------------------------------|---------------------------------------------------------------------------------------------------------------------------------------------------------------------------------------------------------------------------------------------------------------------------|
| <b>Incidence of Early-Onset Sepsis</b>          | Local incidence if known<br>If not, use 0.5/1000 live births (CC national incidence)                                                                                                                                                                                                                                                                                                                                                                                                                                                                                                                                                                                                                                                                                                                                                                                                                      |                                                                                                                                                                                                                                                                           |
| <b>Gestational Age</b>                          | Gestational age at birth, in weeks and days                                                                                                                                                                                                                                                                                                                                                                                                                                                                                                                                                                                                                                                                                                                                                                                                                                                               | "Weeks" value range 34-43<br>"Days" value range 0-6                                                                                                                                                                                                                       |
| <b>Highest Maternal Intrapartum Temperature</b> | Enter the value and remember to choose "Fahrenheit" or "Celsius" for the temperature unit.<br><br><b>Note:</b> Maternal fever that occurs within 1 hour after delivery can be counted as the "highest intrapartum temperature" for the purpose of calculating the risk estimate at birth.                                                                                                                                                                                                                                                                                                                                                                                                                                                                                                                                                                                                                 | Value may be whole number or number with single decimal place<br><br><b>Examples:</b> 101, 101.0 and 101.5 are all acceptable entry values                                                                                                                                |
| <b>ROM (hours)</b>                              | Duration of time between rupture of and birth, in hours                                                                                                                                                                                                                                                                                                                                                                                                                                                                                                                                                                                                                                                                                                                                                                                                                                                   | Value may be whole number rounded to the nearest hour OR number with single decimal place<br><b>Example:</b> ROM time 4 hours and 30 minutes should be entered as 4.5 hours.<br><b>Example:</b> ROM time 4 hours and 55 minutes can be entered as 4.9 hours or as 5 hours |
| <b>GBS</b>                                      | Enter maternal GBS screening result                                                                                                                                                                                                                                                                                                                                                                                                                                                                                                                                                                                                                                                                                                                                                                                                                                                                       |                                                                                                                                                                                                                                                                           |
| <b>Type of Intrapartum Antibiotics</b>          | Choice must include <b>type</b> of antibiotic given and <b>duration of time</b> prior to birth that first dose was given.<br><br><b>GBS-specific antibiotics</b> are currently defined by CDC 2010 GBS guidelines as ONLY penicillin G; ampicillin; or cefazolin given for the purpose of GBS prophylaxis. This should apply only to mothers who are GBS positive or GBS unknown.<br><br><ul style="list-style-type: none"> <li>If erythromycin, clindamycin or vancomycin ALONE are given for GBS prophylaxis, choose "None or antibiotics given &lt; 2 hours prior to delivery." These medications do not reliably provide neonatal protection from GBS infection, although they may provide some protection to the mother</li> <li><b>Timing</b> of administration of GBS-specific antibiotics is determined by subtracting the time of the first dose of antibiotic from the time of birth</li> </ul> |                                                                                                                                                                                                                                                                           |

|  |                                                                                                                                                                                                                                                                                                                                                                                                                                                                                                                                                                                                                                                                                                                                                                                                                                                                                                                                                                                                                                                                                                                                                                                                                                                                                                                                                                                                                                                                                                                                                                                                                                                                                                                                                                                                                                                                                                                                                                                                                                                                                                                                                                                                                                                                                                                                                                                 |
|--|---------------------------------------------------------------------------------------------------------------------------------------------------------------------------------------------------------------------------------------------------------------------------------------------------------------------------------------------------------------------------------------------------------------------------------------------------------------------------------------------------------------------------------------------------------------------------------------------------------------------------------------------------------------------------------------------------------------------------------------------------------------------------------------------------------------------------------------------------------------------------------------------------------------------------------------------------------------------------------------------------------------------------------------------------------------------------------------------------------------------------------------------------------------------------------------------------------------------------------------------------------------------------------------------------------------------------------------------------------------------------------------------------------------------------------------------------------------------------------------------------------------------------------------------------------------------------------------------------------------------------------------------------------------------------------------------------------------------------------------------------------------------------------------------------------------------------------------------------------------------------------------------------------------------------------------------------------------------------------------------------------------------------------------------------------------------------------------------------------------------------------------------------------------------------------------------------------------------------------------------------------------------------------------------------------------------------------------------------------------------------------|
|  | <p><b>Broad-spectrum antibiotics</b> are defined as <u>two more antibiotics given in combination</u> when there is concern for the mother developing chorioamnionitis/intraamniotic infection**. Usually this concern is prompted by maternal intrapartum fever.</p> <p><b>To determine the timing of broad-spectrum intrapartum antibiotic administration</b>, compare the time of the administration of the second antibiotic in the combination, to the time of birth.</p> <ul style="list-style-type: none"> <li>• <b>Example:</b> ampicillin is given at 2:00 PM; gentamicin is given at 3:30 PM. Birth is at 4:30 PM. Because the second antibiotic of the combination was given &lt; 2 hours prior to birth. One could consider choosing “GBS-specific &gt; 2 hours prior to birth” but if that was not the <b>intent</b> of administering the antibiotics, and the actual intent was to administer ampicillin and gentamicin – the most conservative decision is to choose “None or antibiotics given &lt; 2 hours prior to birth”.</li> <li>• <b>Example:</b> ampicillin is given at 1:00 PM; gentamicin is given at 2:00 PM. Birth is at 4:30 PM. Because the second antibiotic of the combination was given 2.5 hours prior to delivery, choose “Broad-spectrum antibiotics given 2-3.9 hours prior to birth”.</li> <li>• <b>Example:</b> ampicillin is given at 10:00 AM; gentamicin is given at 11:00 AM. Birth is at 4:30 PM. Because the second antibiotic of the combination was given &gt; 4 hours prior to delivery, choose “Broad-spectrum antibiotics given &gt; 4 hours prior to birth”.</li> </ul> <p><b>If a mother has been given BOTH GBS-specific antibiotics and broad-spectrum antibiotics due to concern for evolving chorioamnionitis/intraamniotic infection, record the most complete treatment.</b></p> <ul style="list-style-type: none"> <li>• <b>Example:</b> Mother is given ampicillin at 8:00 AM and 12:00 PM for GBS positive status. She develops a fever to 101°F at 2:00 PM and gentamicin is given at 3:00 PM. Ampicillin is given at 4:00 PM. Birth is at 4:30 PM. In this case, GBS-specific antibiotics were given &gt; 4 hours prior to delivery, but broad-spectrum antibiotics were given only 1½ hours prior to delivery. In the calculator, choose “GBS-specific antibiotics given &gt; 2 hours prior to birth”.</li> </ul> |
|--|---------------------------------------------------------------------------------------------------------------------------------------------------------------------------------------------------------------------------------------------------------------------------------------------------------------------------------------------------------------------------------------------------------------------------------------------------------------------------------------------------------------------------------------------------------------------------------------------------------------------------------------------------------------------------------------------------------------------------------------------------------------------------------------------------------------------------------------------------------------------------------------------------------------------------------------------------------------------------------------------------------------------------------------------------------------------------------------------------------------------------------------------------------------------------------------------------------------------------------------------------------------------------------------------------------------------------------------------------------------------------------------------------------------------------------------------------------------------------------------------------------------------------------------------------------------------------------------------------------------------------------------------------------------------------------------------------------------------------------------------------------------------------------------------------------------------------------------------------------------------------------------------------------------------------------------------------------------------------------------------------------------------------------------------------------------------------------------------------------------------------------------------------------------------------------------------------------------------------------------------------------------------------------------------------------------------------------------------------------------------------------|

\*\*ACOG has recently provided guidance for antibiotic choice when there is concern for developing intraamniotic infection. Broad-spectrum antibiotics should be defined per this document.

Heine RP, Puopolo KM, Beigi R, Silverman NS, El-Sayed YY. Committee on Obstetric Practice. American College of Obstetrics and Gynecology. Opinion No. 712: Intrapartum Management of Intraamniotic Infection. *Obstet Gynecol*. 2017;130(2):e95-e101.
